# Supplementary material for: Role of Methoprene-Tolerant (Met) in Adult Morphogenesis and in Adult Ecdysis of Blattella germanica
Source: PubMed Central journal article supplement (PMC4114754; doi:10.1371/journal.pone.0103614), 2014-07-29
Supplement: pone.0103614.s004.pdf [file pone.0103614.s004.pdf]

**Table S1** – Primers used to detect transcript levels by qPCR and those used to prepare the dsRNAs for RNAi experiments.

| Primer set | Length (bp) | Forward primer (5'-3')    | Reverse primer (5'-3')   | Encompassed Region                  |
|------------|-------------|---------------------------|--------------------------|-------------------------------------|
| Met        | 58 bp       | CTGTTGGGACATCAGCAGAA      | GGCAGGTGATGGAGTGAAGT     | Nucleotide 470 to 527 of HG965209   |
| Kr-h1      | 77 bp       | GCGAGTATTGCAGCAAATCA      | GGGACGTTCTTTCGTATGGA     | Nucleotide 493 to 569 of HE575250   |
| BR-C       | 76 pb       | CGGGTCGAAGGGAAAGACA       | CTTGGCGCCGAATGCTGCGAT    | Nucleotide 699 to 774 of FN651774   |
| EcR        | 163 bp      | GACAAACTCCTCAGAGAAGATCAAA | CTCCCAATCCTGCCAGACTA     | Nucleotide 1472 to 1634 of AM039690 |
| RXR        | 86 pb       | ATAATTGACAAGAGGCAGAGGAA   | TGAACAGCCTCCCTCTTCAT     | Nucleotide 527 to 612 of AJ854490   |
| E75A       | 101 bp      | GTGCTATTGAGTGTGCGACATGAT  | TCATGATCCCTGGAGTGGTAGAT  | Nucleotide 58 to 158 of AM238653    |
| ILP-1      | 96 bp       | AGAAGCAGAATTCCTTTCCG      | TCATCGACAATGCCTCCGT      | Nucleotide 343 to 438 of HG972850   |
| Actin      | 213 pb      | AGCTTCCTGATGGTCAGGTGA     | TGTCGGCAATTCAGGGTACATGGT | Nucleotide 96 to 308 of AJ862721    |
| dsMet-a    | 458 pb      | GCAAATTGTATCCTTCATCTGC    | TGACAGACTCGCGCTTTATG     | Nucleotide 1309 to 1766 of HG965209 |
| dsMet-b    | 394 pb      | GCAGGCGACCAAGAGTCTAC      | CCACGGCAATCAGAACAGTA     | Nucleotide 581 to 974 of HG965209   |
| dsMock     | 307 pb      | ATCCTTTCCTGGGACCCGGCA     | ATGAAGGCTCGACGATCCTA     | Nucleotide 370 to 676 of K01149     |
