# Supplementary material for: Role of Methoprene-Tolerant (Met) in Adult Morphogenesis and in Adult Ecdysis of Blattella germanica
Source: PubMed Central journal article supplement (PMC4114754; doi:10.1371/journal.pone.0103614), 2014-07-29
Supplement: pone.0103614.s005.pdf [file pone.0103614.s005.pdf]

**Table S2** –Summary of the effects of Met depletion at phenotypic level in the experiments treating with dsMet-a or dsMet-b and at the stages N4, N5 or N6. In all cases the corresponding dsRNA was administered in two 3µg-doses, one on day 0 and the other on day 3 of the given instar. Controls were equivalently treated with dsMock. Methodological details are described in the main text.

|         | <b>Instar of treatment</b> | <b>N</b> | <b>Died before N6</b> | <b>Died during the ecdysis to N6</b> | <b>Nymphoid with adult features in N6</b> | <b>Precocious adult in N6</b> | <b>Died in ecdysis from N6 to adult</b> | <b>Adult with wrinkled wings after N6</b> | <b>Normal adult after N6</b> |
|---------|----------------------------|----------|-----------------------|--------------------------------------|-------------------------------------------|-------------------------------|-----------------------------------------|-------------------------------------------|------------------------------|
| dsMet-a | N4                         | 54       | 9                     | 8                                    | 7                                         | 11                            | 10                                      | 4                                         | 5                            |
| dsMet-b | N4                         | 10       | 1                     | 2                                    | 2                                         | 1                             | 1                                       | 2                                         | 1                            |
| dsMock  | N4                         | 27       | 0                     | 0                                    | 0                                         | 0                             | 0                                       | 0                                         | 27                           |
| dsMet-a | N5                         | 35       | 0                     | 0                                    | 5                                         | 1                             | 5                                       | 12                                        | 12                           |
| dsMet-b | N5                         | 25       | 0                     | 0                                    | 5                                         | 0                             | 1                                       | 12                                        | 7                            |
| dsMock  | N5                         | 19       | 0                     | 0                                    | 0                                         | 0                             | 0                                       | 0                                         | 19                           |
| dsMet-a | N6                         | 28       | -                     | -                                    | -                                         | -                             | 5                                       | 10                                        | 13                           |
| dsMock  | N6                         | 14       | 0                     | 0                                    | 0                                         | 0                             | 0                                       | 0                                         | 14                           |
